# Supplementary material
Source: publisher site journal article supplement (https://www.degruyter.com/publication/journal_key/COMM/downloadAsset/COMM_Instructions_for_Authors_COMM_03-24.pdf)
Supplement: Supplementary file 1 [file COMM_Instructions_for_Authors_COMM_03-24.pdf]

# COMMUNICATIONS

The European Journal of Communication Research

## Instructions for Authors

For further information: <https://www.degruyter.com/view/j/comm>. If you have any questions, please contact [journal.commun@degruyter.com](mailto:journal.commun@degruyter.com).

### 1. Submitting an article for publication

COMMUNICATIONS welcomes submissions from a wide range of communication research topics. We accept **full articles** as well as **research in briefs**.

Manuscripts should present original work that has not been published elsewhere, in any language, and should not be simultaneously submitted to other journals. Submissions should be written in English. Authors whose native language is not English are strongly advised to have their manuscripts reviewed by a native speaker before submission. If examples in a language other than English are included, please provide aligned interlinear glosses and idiomatic translations.

Manuscripts for consideration in COMMUNICATIONS should be submitted via the online [submission system](#) to the editor. We follow a double-blind review process, so please ensure that your complete manuscript (main document) does not include a title page, acknowledgments, running headers with author names, or any other identifying information that would hinder blinded review. Additionally, anonymize citations if necessary. Make sure to include the title, abstract, and keywords in your Main Document (Word file).

When submitting a revised version of your manuscript, please upload two versions: 1) an anonymized version and 2) a second version with all author information added (including non-anonymized citations). Save this second version as a ZIP archive before uploading.

### 2. Formatting, style, and formal requirements

In general, manuscripts should be prepared in accordance with the 7<sup>th</sup> edition of the *Publication Manual of the American Psychological Association*. Manuscripts that do not conform to the APA guidelines will be returned to the authors without review.

#### Citations and references

Citations should conform to the following example: (Smart, 1974, p. 22)

References should conform to the following examples:

#### *Periodical*

Gabennesh, H. (1972). Authoritarianism as world view. *American Journal of Sociology*, 77(5), 857-875.

#### *Nonperiodical*

Gifi, A. (1991). *Nonlinear multivariate analysis*. Chichester: Wiley.

#### *Part of a nonperiodical*

Gray, A. (1996). Behind closed doors: Video recorders in the home. In H. Baehr, & A. Gray (Eds.), *Turning it on: A reader in women and media* (pp. 118-129). London: Arnold.

Please translate bibliographic information (titles of articles and monographs) into English.

Weber, M. (1920). *Wirtschaft und Gesellschaft. Grundriß der verstehenden Soziologie* [*Economy and Society. A Treaty on the Sociology of Understanding*]. Tübingen: Mohr Siebeck.

### **Word count**

The manuscript should not exceed 8000 words for articles or 4000 words for research in briefs.

### **Formatting**

The manuscript should be double-spaced (including notes and references) with standard margins. All pages should be numbered consecutively. Please avoid using boldface type for emphasis. Use double quotation marks for citations and single quotation marks for emphasis or translations.

### **Formal requirements**

Accepted formats for submission are: doc, odt, pdf, and latex.

Submissions must include the following documents:

- Main document: abstract of 100-150 words; keywords; anonymized article.
- Second document: names, affiliations, and contact information for all authors.

Please note that figures and diagrams must be reproducible originals, clearly numbered, referenced in the main document, and their approximate positions indicated. Image files should be uploaded separately (you will be guided through the uploading process in the system). Keep notes to a minimum, keep them brief, and do not include diagrams or tables.

## **3. Peer review**

Manuscripts received will first be screened by one of the editors or co-editors to ensure thematic adequacy and sufficient quality. If a manuscript is considered appropriate for review, it will be sent out to a minimum of two reviewers. The review process is mutually anonymous: Reviewers' identities are kept confidential from authors, and authors' identities are kept confidential from reviewers.

## **4. Proofs**

After final acceptance, authors will receive PDF proofs for correction, which must be returned by the dates given in the production schedule.

## 5. Open Access Publication

De Gruyter has established a number of open access agreements. You can find a list of participating institutions and further information here: <https://www.degruyter.com/publishing/publications/openaccess/open-access-agreements?lang=en>.

Once an article is imported from ScholarOne to the production system, a check is automatically carried out for the corresponding author based on the provided email address to determine if an agreement exists. Therefore, **we recommend providing an institutional email address as the contact address.**
